# Supplementary material
Source: PubMed Central journal article supplement (PMC8522830)
Supplement: pxaa112_suppl_supplementary_appendix_1.pdf [file pxaa112_suppl_supplementary_appendix_1.pdf]

Appendix 1: First Tier Metabolic Test volume 2006-2019 in comparison to more specialized metabolic tests

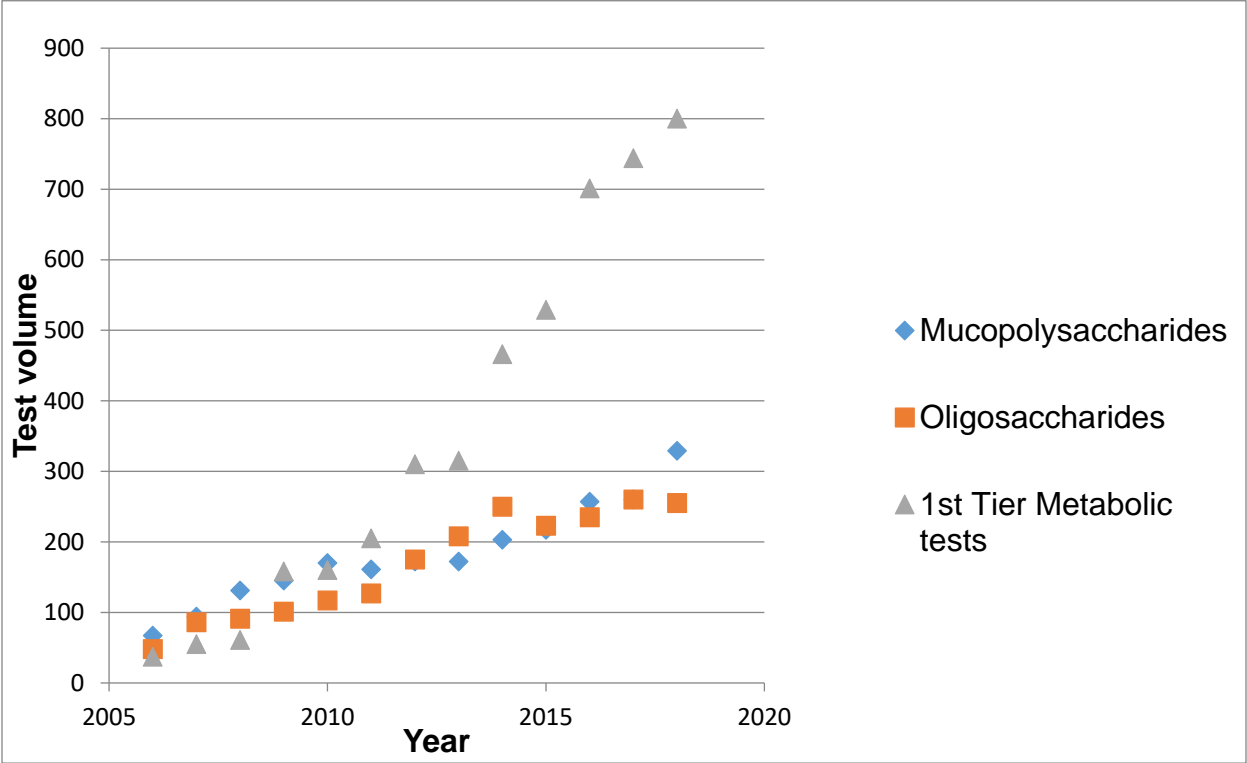

Legend: First Tier metabolic tests: plasma amino acids, urine organic acids, blood spot acylcarnitines, urine purines, pyrimidines and creatine metabolites.
